# Supplementary material for: PIP3-dependent macropinocytosis is incompatible with chemotaxis
Source: PubMed Central journal article supplement — J Cell Biol. 2014 Feb 17;204(4):497–505. doi: 10.1083/jcb.201309081 (PMC3926956; doi:10.1083/jcb.201309081), 2014-02-17
Supplement: supp_jcb.201309081_JCB_201309081_sm.pdf [file supp_jcb.201309081_JCB_201309081_sm.pdf]

Veltman et al., <http://www.jcb.org/cgi/content/full/jcb.201309081/DC1>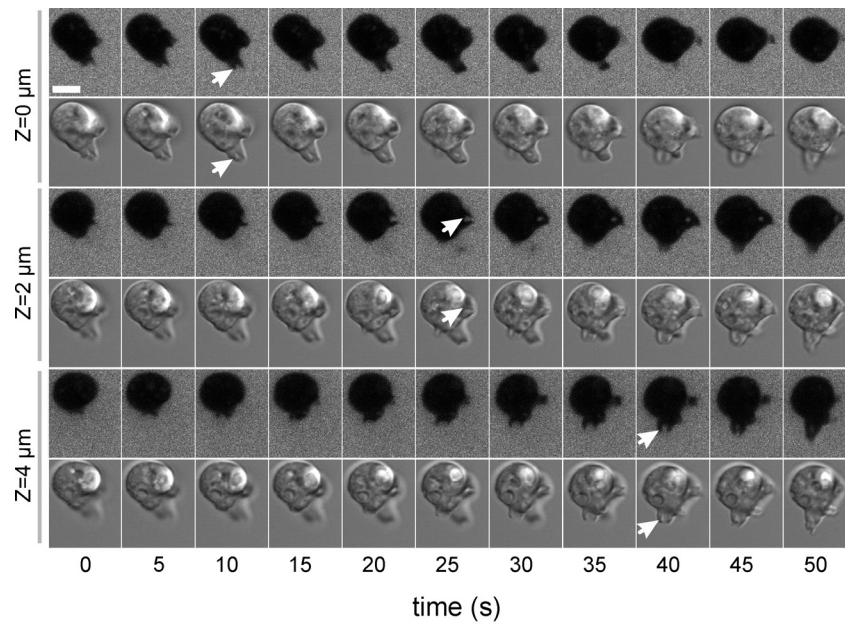

Figure S1. **Determination of the rate of macropinocytosis.** The rate of macropinocytosis was determined via direct visualization of uptake events of fluorescent dextran. Cells (shown is AX2) were allowed to settle on a glass-bottomed dish under medium supplemented with FITC-dextran. The lowest confocal plane ( $z = 0$ ) was taken just above the glass substratum. Individual uptake events are marked with the arrows. Bar, 10  $\mu\text{m}$ .

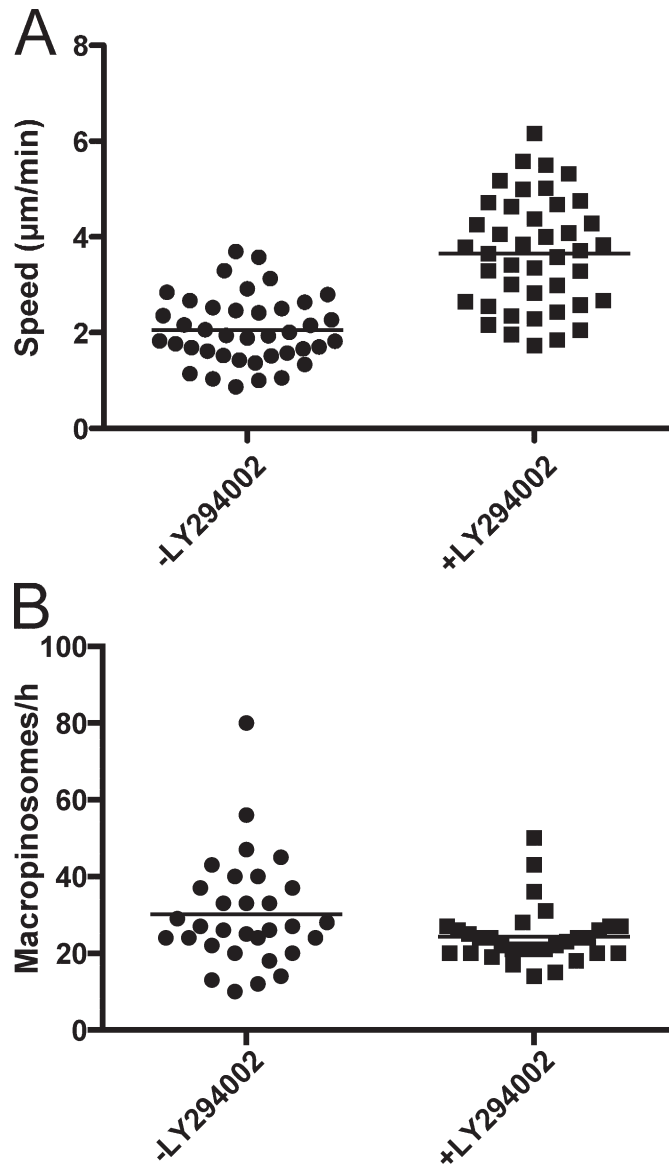

Figure S2. **LY294002 inhibits macropinocytosis and increases migration speed.** (A) Speeds of randomly moving Lifeact-mRFP-transfected AX2 cells were measured as described in Materials and methods, in the absence or presence of 10  $\mu\text{M}$  LY294002. Treated cells are significantly faster (two-tailed *t* test,  $n = 40$ ,  $P < 0.0001$ ). (B) Macropinosomes in Lifeact-mRFP-transfected AX2 cells were measured by counting closed, circular actin structures as described in Materials and methods, in the absence or presence of 10  $\mu\text{M}$  LY294002. Treated cells make significantly fewer macropinosomes (two-tailed *t* test,  $n = 31$ ,  $P < 0.05$ )

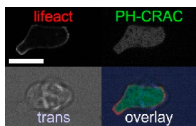

Video 1. **PIP<sub>3</sub> induces negative curvature at the leading edge.** AX2 cells were transfected with a vector that expresses the F-actin marker Lifeact-mRFP and the PIP<sub>3</sub> marker PH-CRAC-GFP. Cells were grown axenically in HL5 medium and incubated overnight in LoFlo medium to reduce autofluorescence. Cells were transferred to an acid-washed glass-bottom dish (MatTek Corporation) and allowed to migrate randomly without stimulation. Images were acquired sequentially on a spinning disk microscope in the following order: mRFP, GFP, trans. Exposure time per channel was 90 ms, and one set of images was collected every 2 s.

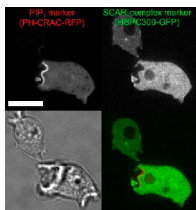

Video 2. **The SCAR complex is recruited to the edge of PIP<sub>3</sub> patches.** AX2 cells were transfected with a vector that expresses the PIP<sub>3</sub> marker PH-CRAC-RFP and the SCAR-WAVE complex marker HSPC300-GFP. Cells were cultured axenically in HL5 medium and incubated for 3 h in SorMC buffer before imaging to reduce autofluorescence. Cells were transferred to an acid-washed glass-bottom dish (MatTek Corporation) and allowed to migrate randomly. Images were acquired sequentially on a spinning disk microscope in the following order: RFP, GFP, trans. Exposure time per channel was 90 ms, and one set of images was collected per second. The RFP channel was corrected for bleaching using standard methods.
